# Supplementary material for: Link Protein N-Terminal Peptide as a Potential Stimulating Factor for Stem Cell-Based Cartilage Regeneration
Source: Hindawi journal article supplement (doi:10.1155/2018/3217895), 2018-01-01

## Quality Inspection Report

**Product Name:** LPP  
**Lot Num:** P1701342  
**Sequence:** [CH3CONH]- DHLSDNYTLDHDRAIH-[CONH2]  
**Molecular Weight:** 1963.07  
**Mass Spectral Analysis:** see attached MS spectrogram  
**HPLC Analysis:** Peptide purity:>92%  
**Solubility:** 1 mg/ml in DMSO  
**Appearance:** White lyophilized powder  
**Counter Ion:** Trifluoroacetate  
**Date of Mfg:** 02/27/17

**Quality Assurance By:** Quality Control Department

**Date:** 02/27/17

**Zhejiang Ontores Biotechnologies Co.,Ltd**

**SAMPLE INFORMATION**

|                                          |              |                     |                     |
|------------------------------------------|--------------|---------------------|---------------------|
| Sample Name:                             | P1701342     | Acquired By:        | System              |
| Sample Type:                             | Unknown      | Sample Set Name:    | 20170228            |
| Vial:                                    | 25           | Acq. Method Set:    | 15% _35% in 20 mins |
| Injection #:                             | 1            | Processing Method:  | Default             |
| Injection Volume:                        | 20.00 ul     | Channel Name:       | 2487Channel 1       |
| Run Time:                                | 20.0 Minutes | Proc. Chnl. Descr.: | 220 nm              |
| Date Acquired: 2/28/2017 9:19:09 AM CST  |              |                     |                     |
| Date Processed: 2/28/2017 9:43:47 AM CST |              |                     |                     |

**Auto-Scaled Chromatogram**

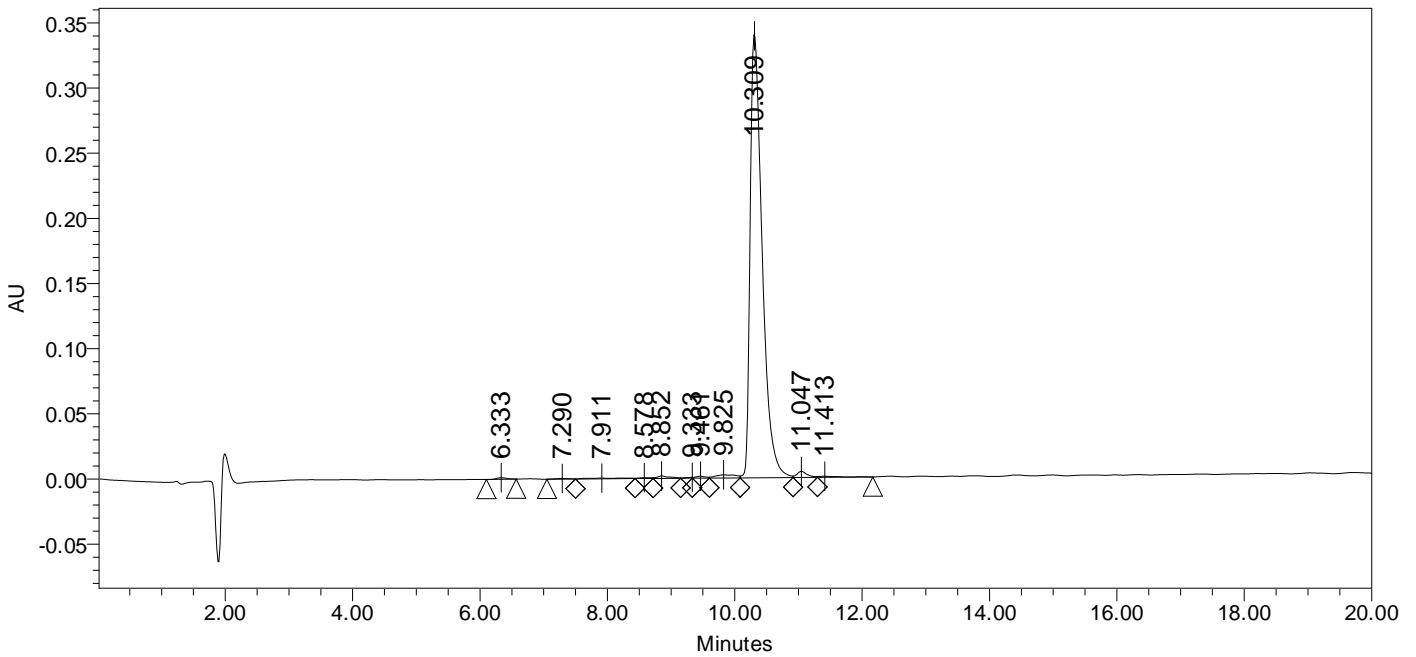

**Peak Results**

|   | RT     | Int Type | Area    | Width (sec) | Height | % Area |
|---|--------|----------|---------|-------------|--------|--------|
| 1 | 6.333  | bB       | 13218   | 28.000      | 1172   | 0.28   |
| 2 | 7.290  | BV       | 7377    | 27.000      | 422    | 0.16   |
| 3 | 7.911  | VV       | 21426   | 56.000      | 494    | 0.46   |
| 4 | 8.578  | VV       | 8855    | 17.000      | 638    | 0.19   |
| 5 | 8.852  | VV       | 25728   | 26.000      | 1829   | 0.55   |
| 6 | 9.333  | VV       | 5044    | 11.000      | 604    | 0.11   |
| 7 | 9.461  | VV       | 16223   | 16.000      | 1456   | 0.35   |
| 8 | 9.825  | VV       | 53064   | 29.000      | 2453   | 1.13   |
| 9 | 10.309 | VV       | 4467311 | 50.000      | 342193 | 95.33  |

**Peak Results**

|    | RT     | Int Type | Area  | Width (sec) | Height | % Area |
|----|--------|----------|-------|-------------|--------|--------|
| 10 | 11.047 | VV       | 51834 | 23.000      | 4705   | 1.11   |
| 11 | 11.413 | Vb       | 16249 | 52.000      | 816    | 0.35   |

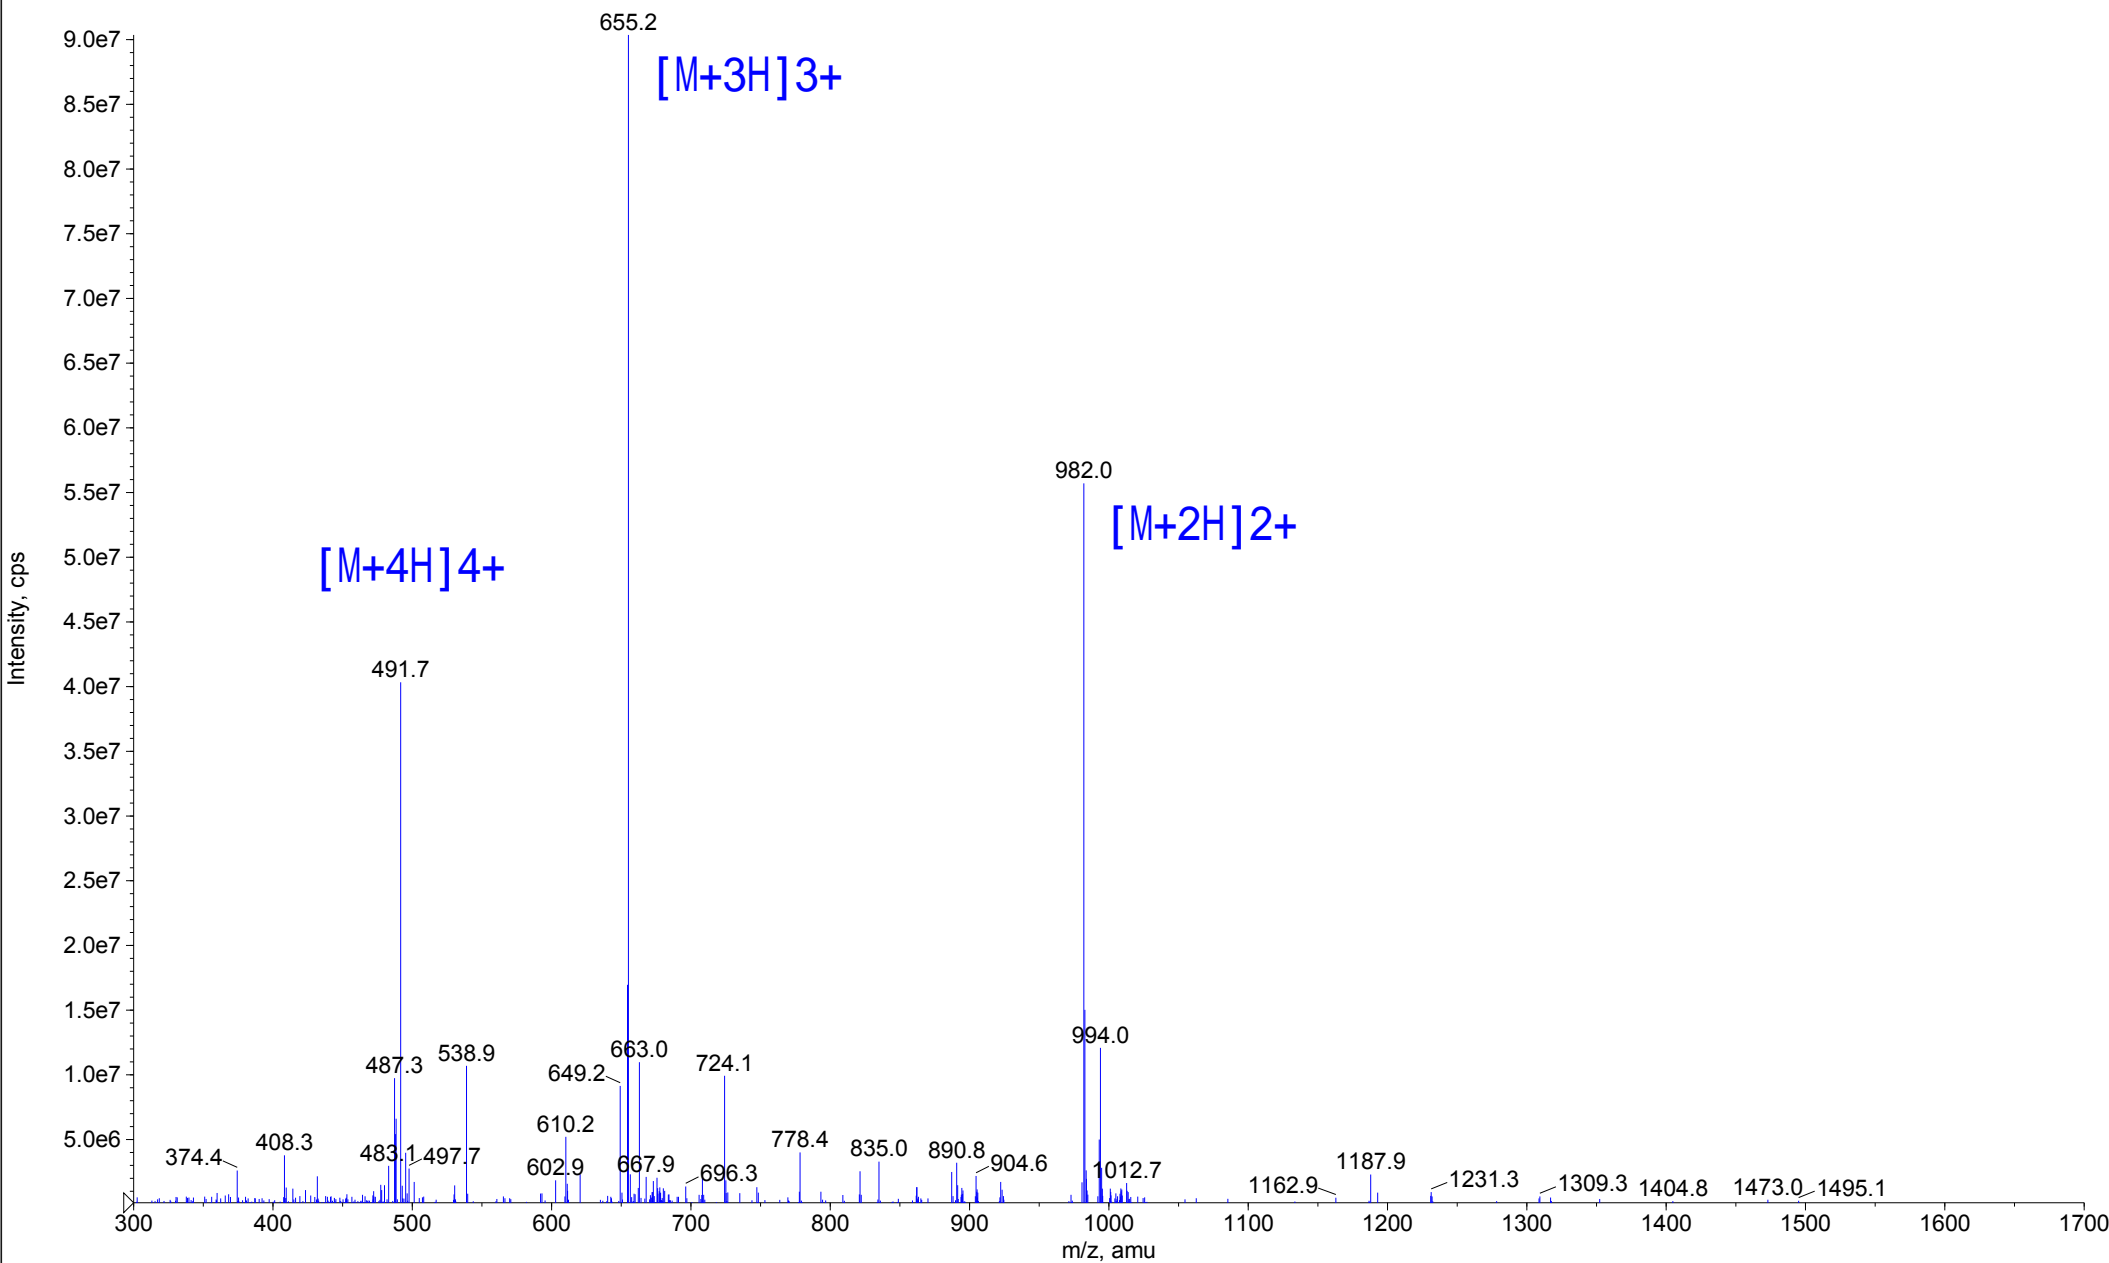

Supplement: f1 [file 3217895.f1.pdf]
